# Supplementary material for: Transcriptomics Reveals Fast Changes in Salicylate and Jasmonate Signaling Pathways in Shoots of Carbonate-Tolerant Arabidopsis thaliana under Bicarbonate Exposure
Source: MDPI journal article supplement (doi:10.3390/ijms22031226), 2021-01-27
Supplement: s1 [file s1]

## Supplementary Materials:

Transcriptomics reveals fast changes in salicylate and jasmonate signaling pathways in shoots of carbonate tolerant *Arabidopsis thaliana* under bicarbonate exposure.

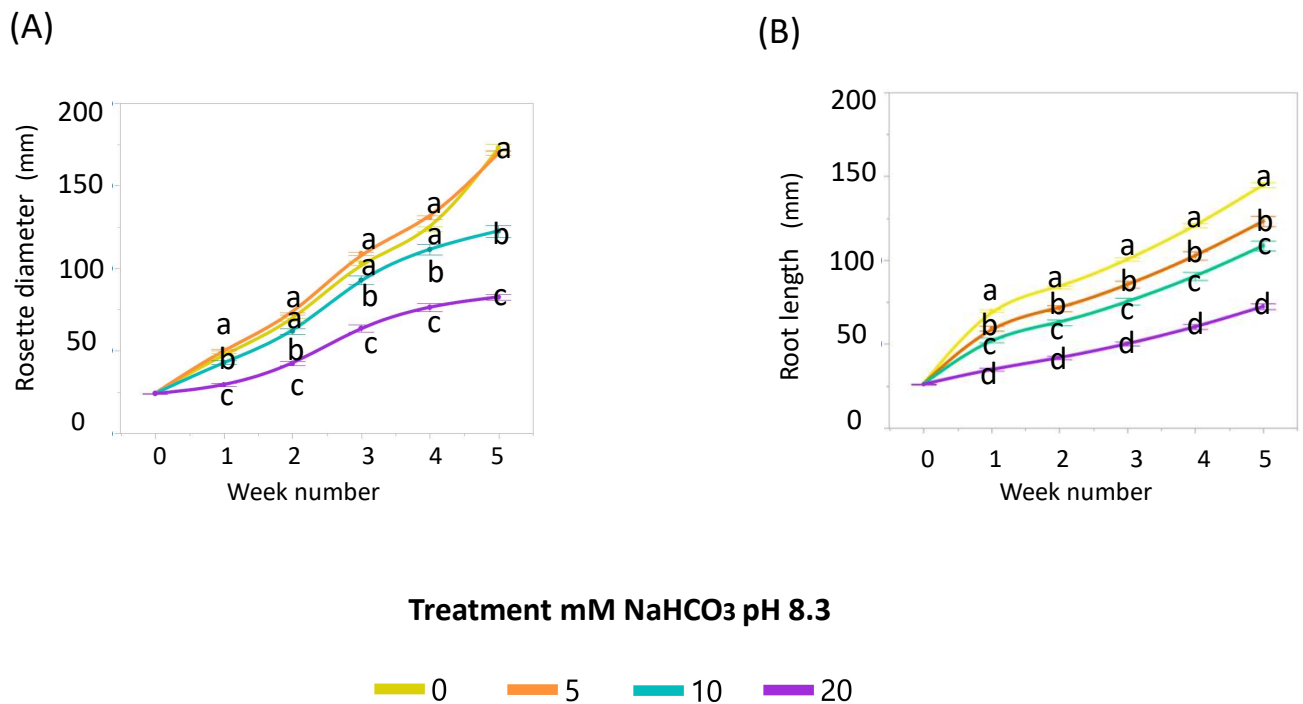

**Figure S1: Growth responses of moderately bicarbonate tolerant *A. thaliana* to different  $\text{NaHCO}_3$  concentrations** (A) Rosette diameter (cm) and (B) root length (cm) of  $\text{Al}_{(\text{c}+)}$  plants grown in hydroponics for 5 weeks. Letters indicate significant differences between treatment ( $n=9$ ;  $p < 0.05$  according to Tukey's HSD).

(A)

| Gene Name                                      | TAIR id   | LFC_3h_A1(c+)_bic | LFC_3h_T6(c-)_bic | Forward sequence      | Reverse sequence      |
|------------------------------------------------|-----------|-------------------|-------------------|-----------------------|-----------------------|
| Vacuolar iron transporter (VIT) family protein | AT1G76800 | -0.88             | -3.13             | TTTCCGAGGTGCGATTGTA   | CCTAGCCGATGACCTAACCG  |
| MATE efflux family protein                     | AT2G04050 | -2.23             | 0.40              | CTCTCACATGCCGAAACATT  | TGCCAACCACTTCCCCTTG   |
| Transmembrane protein                          | AT2G25510 | 2.50              | -1.10             | AGGCACAAACGAACCTGGTC  | TTATAGCGGCCGTTGACAA   |
| NAC domain (NAC044)                            | AT3G01600 | -2.08             | 0.42              | GTGGGATTGGTGGCTCTGAA  | ATGCCTGCACTGTCTTGTA   |
| Receptor like protein 39(RLP39)                | AT3G24900 | 1.65              | -0.67             | TCCTTGCTTCAAGCTTCTTCT | TATCGACCACACCCCATTC   |
| Peroxidase superfamily protein                 | AT4G11290 | -1.67             | 1.04              | TGGTGGACCGACATGGAAC   | TGGCACCGGATAACAAGAC   |
| NADP-malic enzyme 3(NADP-ME3)                  | AT5G25880 | -1.86             | 0.90              | TCGTGTCCTGATGACATGC   | GATTTCGATGCCAGTCCGAGT |
| Late embryogenesis abundant protein (LEA)      | AT5G53820 | 1.07              | -2.52             | CAGAGCATGAGCTTCAACGC  | ATGGTCTCACTCGACCTTG   |

(B)

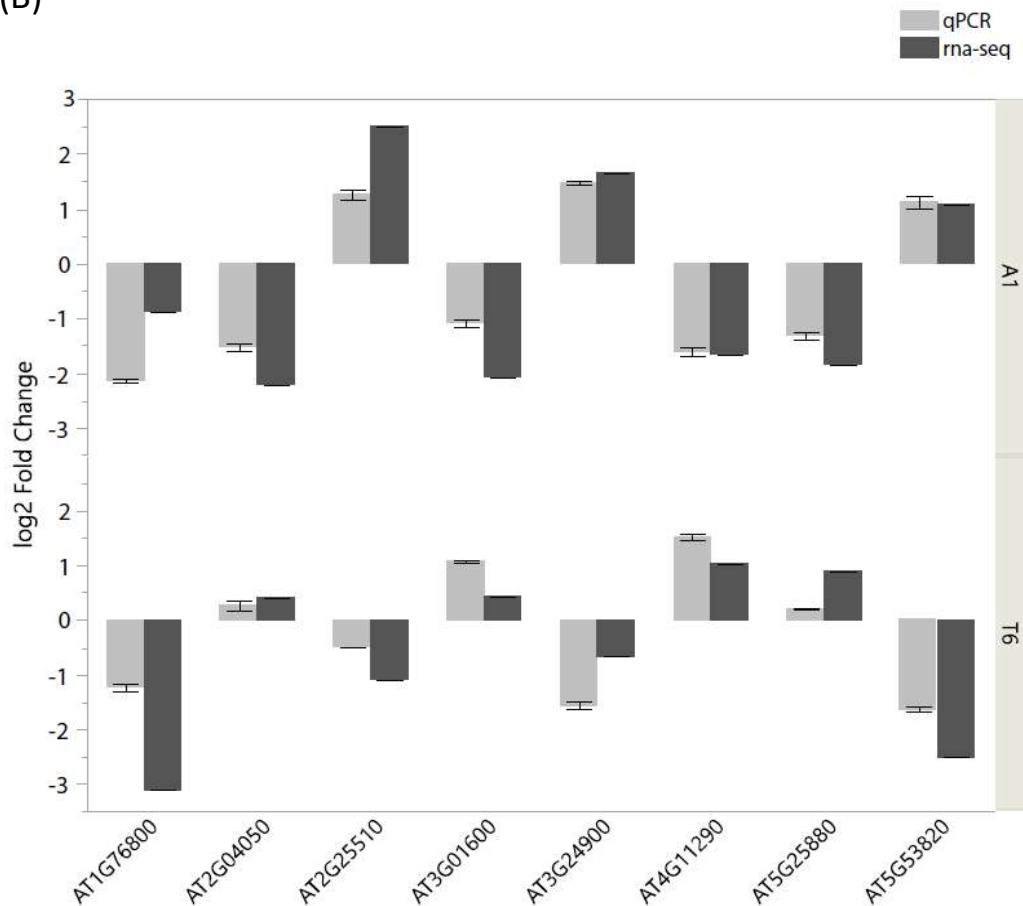

**Figure S2: RNA-seq validation.** (A) Primer sequence from 8 selected genes used for validation of the RNA-seq expression results. (B) Bar plot from RNA-seq (dark grey) and qPCR (light grey) expression results from the selected genes after 3 hours of exposure to bic and pH<sub>5.9</sub>. Results are expressed in log2 fold change ; bars indicate standard error.

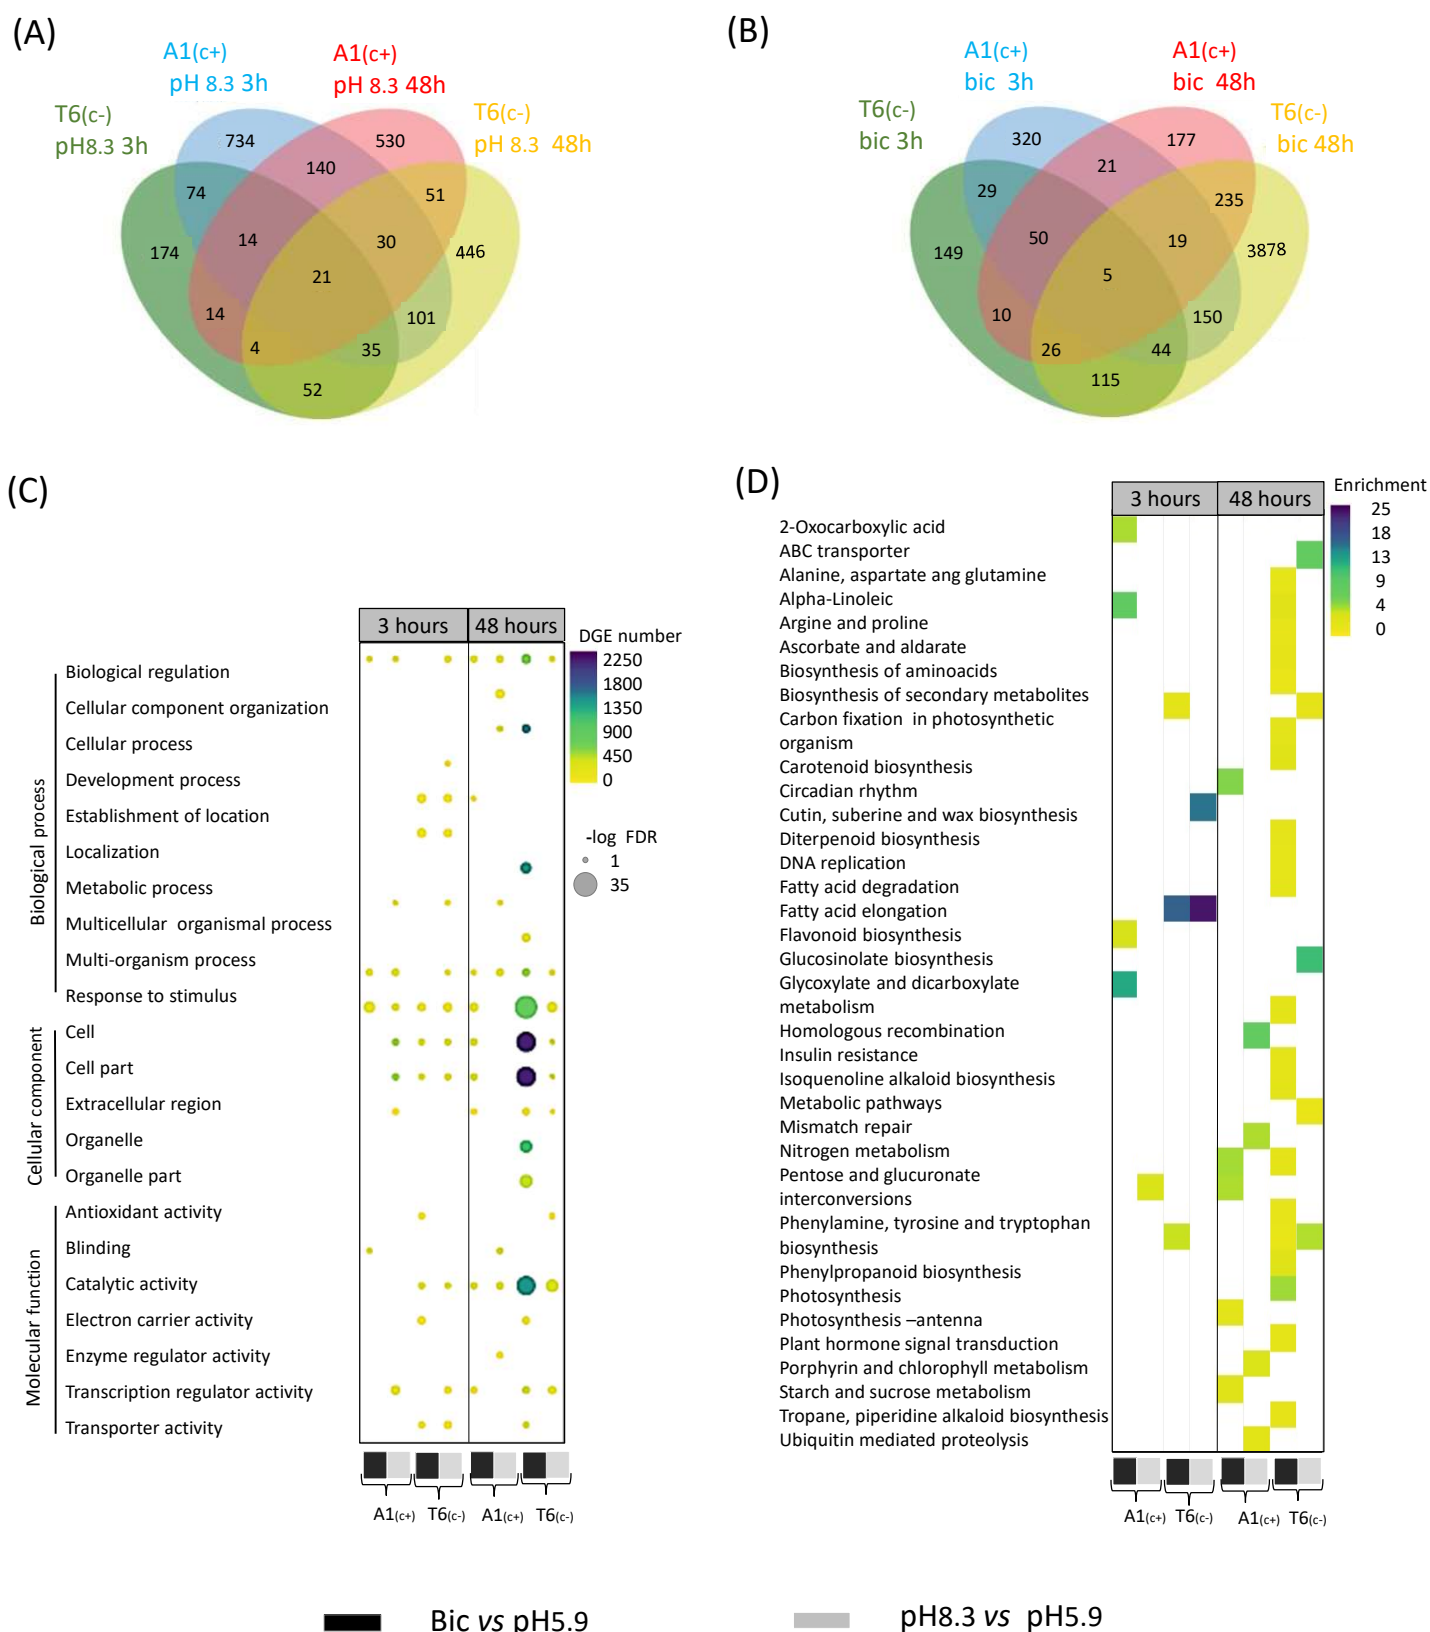

**Figure S3: GO and KEEG pathway of demes comparing alkaline treatment at two time points.** Venn diagram of up and downregulated DGEs comparing bic vs pH<sub>5.9</sub> and pH<sub>8.3</sub> vs pH<sub>5.9</sub> treatments after 3 h and 48 h between A1(c+) (A) and T6(c-) (B) demes. (C) Bubble plot indicating significant GO analysis of DGEs in bic vs pH<sub>5.9</sub> and pH<sub>8.3</sub> vs pH<sub>5.9</sub> treatments after 3 h and 48 h in A1(c+) and T6(c-) demes. GO were filtered to adjusted p-value < 0.05. Scale colors indicate number of DGEs, while bubble size indicates -log of adjusted p-value. GO terms were separated into biological function, cellular component, and molecular function. (D) Heatmap plots of KEEG pathway analysis of DGEs in bic vs pH<sub>5.9</sub> and pH<sub>8.3</sub> vs pH<sub>5.9</sub> treatments after 3 h and 48 h between A1(c+) and T6(c-) demes. KEEG pathway terms were filtered by p-value < 0.05. Scale colors indicate pathway fold enrichment
